# Supplementary material
Source: PubMed Central journal article supplement (PMC6695305)
Supplement: djz073_supplementary_data.pdf [file djz073_supplementary_data.pdf]

## SUPPLEMENTARY MATERIAL

### Supplementary Methods

#### Detailed search strategy

##### Embase.com

((('folinic acid'/exp AND fluorouracil/exp AND irinotecan/exp AND oxaliplatin/exp AND 'drug combination'/exp AND ('pancreas cancer'/de OR 'pancreas tumor'/de OR 'pancreas adenoma'/de OR 'pancreas adenocarcinoma'/de OR 'pancreas carcinoma'/de OR 'pancreas islet cell carcinoma'/de OR (pancrea\* NEAR/3 (cancer\* OR neoplas\* OR tumo\* OR adenocarcinom\* OR carcinom\* OR adenom\*)):ab,ti)) OR (Folfirinox):ab,ti)

##### Medline (Ovid)

((Leucovorin/ AND fluorouracil/ AND irinotecan.mp. AND oxaliplatin.mp. AND Drug Combinations/ AND (exp Pancreatic Neoplasms/ OR (pancrea\* ADJ3 (cancer\* OR neoplas\* OR tumo\* OR adenocarcinom\* OR carcinom\* OR adenom\*)),ab,ti.)) OR (Folfirinox).ab,ti.)

##### Cochrane

(Folfirinox):ab,ti

##### Web-of-science

TS=(Folfirinox)

##### Scopus

TITLE-ABS-KEY(Folfirinox)

Google scholar

Folfirinox

**References Excluded studies after full text assessment, *n*=30**

Only other regimen than FOLFIRINOX, *n*=10

1. Kantor O, Talamonti MS, Stocker SJ, et al. A Graded Evaluation of Outcomes Following Pancreaticoduodenectomy with Major Vascular Resection in Pancreatic Cancer. *Journal of Gastrointestinal Surgery* 2016;20:284-91.
2. Mellon EA, Strom TJ, Hoffe SE, et al. Favorable perioperative outcomes after resection of borderline resectable pancreatic cancer treated with neoadjuvant stereotactic radiation and chemotherapy compared with upfront pancreatectomy for resectable cancer. *J Gastrointest Oncol* 2016;7:547-55.
3. Miura JT, Krepline AN, George B, et al. Use of neoadjuvant therapy in patients 75 years of age and older with pancreatic cancer. *Surgery* 2015;158:1545-55.
4. Peters NA, Javed AA, Cameron JL, et al. Modified Appleby Procedure for Pancreatic Adenocarcinoma: Does Improved Neoadjuvant Therapy Warrant Such an Aggressive Approach? *Ann Surg Oncol* 2016:1-8.
5. Taieb J, Lecomte T, Aparicio T, et al. FOLFIRI.3, a new regimen combining 5-fluorouracil, folinic acid and irinotecan, for advanced pancreatic cancer: Results of an Association des Gastro-Enterologues Oncologues (Gastroenterologist Oncologist Association) multicenter phase II study. *Ann Oncol* 2007;18:498-503.

6. Oh SY, Kim HJ, Kim TH, et al. Pilot study of irinotecan/oxaliplatin (IROX) combination chemotherapy for patients with gemcitabine- and 5-fluorouracil-refractory pancreatic cancer. *Invest New Drugs* 2010;28:343-9.
7. Mazard T, Ychou M, Thezenas S, et al. Feasibility of biweekly combination chemotherapy with capecitabine, irinotecan, and oxaliplatin in patients with metastatic solid tumors: results of a two-step phase I trial: XELIRI and XELIRINOX. *Cancer Chemotherapy and Pharmacology* 2012;69:807-14.
8. Franko J, Hsu HW, Thirunavukarasu P, Frankova D, Goldman CD. Chemotherapy and radiation components of neoadjuvant treatment of pancreatic head adenocarcinoma: Impact on perioperative mortality and long-term survival. *Ejso* 2017;43:351-7.
9. Shubert CR, Bergquist JR, Groeschl RT, et al. Overall survival is increased among stage III pancreatic adenocarcinoma patients receiving neoadjuvant chemotherapy compared to surgery first and adjuvant chemotherapy: An intention to treat analysis of the National Cancer Database. *Surgery* 2016;160:1080-93.
10. Paik WH, Lee SH, Kim YT, Park JM, Song BJ, Ryu JK. Objective Assessment of Surgical Restaging after Concurrent Chemoradiation for Locally Advanced Pancreatic Cancer. *Journal of Korean Medical Science* 2015;30:917-23.

No (B)RPC included, n=15

11. Baldini C, Escande A, Bouché O, et al. Safety and efficacy of FOLFIRINOX in elderly patients with metastatic or locally advanced pancreatic adenocarcinoma: A retrospective analysis. *Pancreatology* 2017;17:146-9.
12. Bednar F, Zenati MS, Steve J, et al. Analysis of Predictors of Resection and Survival in Locally Advanced Stage III Pancreatic Cancer: Does the Nature of Chemotherapy Regimen Influence Outcomes? *Ann Surg Oncol* 2017;24:1406-13.

13. Chen X, Liu G, Wang KQ, Chen GD, Sun JJ. Neoadjuvant radiation followed by resection versus upfront resection for locally advanced pancreatic cancer patients: a propensity score matched analysis. *Oncotarget* 2017;8:47831-40.
14. Guion-Dusserre JF, Bertaut A, Ghiringhelli F, et al. Folfirinox in elderly patients with pancreatic or colorectal cancer-tolerance and efficacy. *World J Gastroenterol* 2016;22:9378-86.
15. Huguet F, Hajj C, Winston CB, et al. Chemotherapy and intensity-modulated radiation therapy for locally advanced pancreatic cancer achieves a high rate of R0 resection. *Acta Oncologica* 2017;56:384-90.
16. Kaga Y, Sunakawa Y, Kubota Y, et al. Early tumor shrinkage as a predictor of favorable outcomes in patients with advanced pancreatic cancer treated with FOLFIRINOX. *Oncotarget* 2016;7:67314-20.
17. Kluger MD, Rashid MF, Rosario VL, et al. Resection of Locally Advanced Pancreatic Cancer without Regression of Arterial Encasement After Modern-Era Neoadjuvant Therapy. 2017.
18. Kus T, Aktas G, Kalender ME, Sevinc A, Camci C. Comparison of FOLFIRINOX Chemotherapy with Other Regimens in Patients with Biliary Tract Cancers: a Retrospective Study. *J Gastrointest Cancer* 2017;48:170-5.
19. Lakatos G, Petranyi A, Szűcs A, et al. Efficacy and Safety of FOLFIRINOX in Locally Advanced Pancreatic Cancer. A Single Center Experience. *Pathol Oncol Res* 2017;23:753-9.
20. Lee JC, Kim JW, Ahn S, et al. Optimal dose reduction of FOLFIRINOX for preserving tumour response in advanced pancreatic cancer: Using cumulative relative dose intensity. *Eur J Cancer* 2017;76:125-33.

21. Wagner M, Antunes C, Pietrasz D, et al. CT evaluation after neoadjuvant FOLFIRINOX chemotherapy for borderline and locally advanced pancreatic adenocarcinoma. *Eur Radiol* 2017;27:3104-16.
22. Faris JE, Blaszkowsky LS, McDermott S, et al. Folfirinox in locally advanced pancreatic cancer: The massachusetts general hospital cancer center experience. *Oncologist* 2013;18:543-8.
23. Gunturu KS, Yao X, Cong X, et al. FOLFIRINOX for locally advanced and metastatic pancreatic cancer: single institution retrospective review of efficacy and toxicity. *Med Oncol* 2013;30:361.
24. Ghorani E, Wong HH, Hewitt C, Calder J, Corrie P, Basu B. Safety and Efficacy of Modified FOLFIRINOX for Advanced Pancreatic Adenocarcinoma: A UK Single-Centre Experience. *Oncology* 2015;89:281-7.
25. Hackert T, Sachsenmaier M, Hinz U, et al. Locally advanced pancreatic cancer: Neoadjuvant therapy with folfirinox results in resectability in 60% of the patients. *Ann Surg* 2016;264:457-61.

Language other than English, n=2

26. Fukuda J, Suzuki Y, Okushiba S, Sato D, Yamamoto K, Hirano S. Locally advanced pancreatic cancer successfully resected after FOLFIRINOX therapy. *Japanese Journal of Gastroenterological Surgery* 2017;50:454-60.
27. Vočka M, Petruzelka L. Modified FOLFIRINOX in the treatment of pancreatic cancer-efficiency and toxicity. *Gastroenterol Hepatol* 2016;70:413-7.

Non-original studie, n=1

28. Katz MHG, Ou FS, Herman JM, et al. Alliance for clinical trials in oncology (ALLIANCE) trial A021501: preoperative extended chemotherapy vs. chemotherapy

plus hypofractionated radiation therapy for borderline resectable adenocarcinoma of the head of the pancreas. BMC Cancer 2017;17:505.

Patients included in other studies, n=2

29. Hosein PJ, Macintyre J, Kawamura C, et al. A retrospective study of neoadjuvant FOLFIRINOX in unresectable or borderline-resectable locally advanced pancreatic adenocarcinoma. BMC Cancer 2012;12.

30. Nanda RH, El-Rayes B, Maithel SK, Landry J. Neoadjuvant modified FOLFIRINOX and chemoradiation therapy for locally advanced pancreatic cancer improves resectability. J Surg Oncol 2015;111:1028-34.

**Supplementary Table 1. Methodological quality assessment according to Critical Appraisal Skill Program (CASP).**

| Study [reference]         | Clear aim | Recruitment | Accurately measured exposure | Accurately measured outcome | Confounding factors identified | Confounding factors accounted | Follow-up complete enough | Follow-up long enough | Precise statistical results presented | Do you believe results | Ability to generalize results | In accordance with existing evidence | Implications of study in practice |
|---------------------------|-----------|-------------|------------------------------|-----------------------------|--------------------------------|-------------------------------|---------------------------|-----------------------|---------------------------------------|------------------------|-------------------------------|--------------------------------------|-----------------------------------|
| Paniccia et al. 2014[1]   | Yes       | Yes         | Yes                          | Yes                         | No                             | No                            | Yes                       | No                    | Yes                                   | Yes                    | No                            | Yes                                  | No                                |
| Christians et al. 2014[2] | Yes       | Yes         | Yes                          | Yes                         | No                             | No                            | Yes                       | No                    | Yes                                   | Yes                    | No                            | Yes                                  | No                                |
| Katz et al. 2016[3]       | Yes       | Yes         | Yes                          | Yes                         | Yes                            | Yes                           | Yes                       | Yes                   | Yes                                   | Yes                    | Yes                           | Yes                                  | Yes                               |
| Okada et al. 2016[4]      | Yes       | Yes         | Yes                          | Yes                         | No                             | No                            | Yes                       | Yes                   | Yes                                   | Yes                    | Yes                           | Yes                                  | No                                |
| Shaib et al. 2016[5]      | Yes       | Yes         | Yes                          | Yes                         | Yes                            | Yes                           | Yes                       | Yes                   | Yes                                   | Yes                    | Yes                           | Yes                                  | Yes                               |
| Yoo et al. 2017[6]        | Yes       | Yes         | Yes                          | Yes                         | Yes                            | Yes                           | Yes                       | Yes                   | Yes                                   | Yes                    | No                            | Yes                                  | No                                |
| Itchins et al. 2017[7]    | Yes       | Yes         | Yes                          | Yes                         | No                             | No                            | Yes                       | Yes                   | Yes                                   | Yes                    | No                            | Yes                                  | No                                |
| Shrestha et al. 2017[8]   | Yes       | Yes         | Yes                          | No                          | Yes                            | Yes                           | Yes                       | Yes                   | Yes                                   | Yes                    | No                            | Yes                                  | No                                |
| Boone et al. 2013[9]      | Yes       | Yes         | Yes                          | Yes                         | No                             | No                            | Yes                       | No                    | Yes                                   | Yes                    | Yes                           | Yes                                  | No                                |
| Ferrone et al. 2015[10]   | Yes       | Yes         | Yes                          | No                          | No                             | No                            | Yes                       | No                    | Yes                                   | No                     | No                            | No                                   | No                                |
| Addeo et al. 2015[11]     | Yes       | Yes         | Yes                          | No                          | Yes                            | No                            | Yes                       | Yes                   | No                                    | Yes                    | No                            | Yes                                  | Yes                               |
| Khushman et al. 2015[12]  | Yes       | Yes         | Yes                          | Yes                         | No                             | No                            | Yes                       | Yes                   | Yes                                   | No                     | No                            | No                                   | No                                |
| Pietrasz et al. 2015[13]  | Yes       | Yes         | Yes                          | Yes                         | Yes                            | Yes                           | Yes                       | No                    | Yes                                   | No                     | No                            | No                                   | Yes                               |
| Mellon et al. 2015[14]    | Yes       | Yes         | No                           | No                          | No                             | No                            | Yes                       | Yes                   | Yes                                   | Yes                    | No                            | Yes                                  | No                                |
| Blazer et al. 2015[15]    | Yes       | Yes         | Yes                          | Yes                         | No                             | No                            | Yes                       | No                    | Yes                                   | Yes                    | Yes                           | Yes                                  | No                                |
| Badiyan et al. 2016[16]   | Yes       | Yes         | Yes                          | No                          | Yes                            | No                            | Yes                       | No                    | Yes                                   | Yes                    | No                            | Yes                                  | No                                |
| Kim et al. 2016[17]       | Yes       | Yes         | Yes                          | No                          | Yes                            | No                            | Yes                       | No                    | Yes                                   | No                     | No                            | No                                   | No                                |
| Vogel et al. 2017[18]     | Yes       | Yes         | Yes                          | No                          | Yes                            | Yes                           | Yes                       | No                    | No                                    | No                     | No                            | Yes                                  | No                                |
| Grose et al. 2017[19]     | Yes       | Yes         | Yes                          | Yes                         | Yes                            | No                            | Yes                       | Yes                   | Yes                                   | Yes                    | No                            | Yes                                  | No                                |
| Tinchon et al. 2013[20]   | Yes       | Yes         | No                           | Yes                         | No                             | No                            | Yes                       | No                    | No                                    | Yes                    | Yes                           | Yes                                  | No                                |
| Peddi et al. 2012[21]     | Yes       | Yes         | Yes                          | Yes                         | No                             | No                            | Yes                       | No                    | No                                    | Yes                    | No                            | Yes                                  | No                                |
| Mahaseth et al. 2013[22]  | Yes       | Yes         | Yes                          | Yes                         | No                             | No                            | Yes                       | No                    | No                                    | Yes                    | No                            | Yes                                  | No                                |
| Moorcraft et al. 2014[23] | Yes       | Yes         | Yes                          | Yes                         | Yes                            | Yes                           | Yes                       | Yes                   | Yes                                   | Yes                    | No                            | Yes                                  | No                                |
| Stein et al. 2016[24]     | Yes       | Yes         | Yes                          | Yes                         | Yes                            | Yes                           | Yes                       | No                    | Yes                                   | Yes                    | Yes                           | Yes                                  | Yes                               |

**Supplementary Table 2. Survival outcomes reported for BRPC patients treated with neoadjuvant FOLFIRINOX.**

| <b>Study [reference]*</b> | <b>No. of patients</b> | <b>Median follow-up*, months (IQR)</b> | <b>Median OS, months (95% CI)</b> | <b>Median PFS, months (95% CI)</b> |
|---------------------------|------------------------|----------------------------------------|-----------------------------------|------------------------------------|
| Paniccia et al. 2014 [1]  | 18                     | 14.5 (10-17)                           | 25.0                              | 14.0                               |
| Katz et al. 2016 [3]      | 22                     | NR                                     | 21.7 (16-nr)                      | NR                                 |
| Shaib et al. 2016 [5]     | 13                     | 18.0                                   | 11.0 (6-nr)                       | 5.7 (3-33)                         |
| Yoo et al. 2017 [6]       | 18                     | 24.1 (14-32)                           | 21.2 (14-28)                      | 16.8 (9-24)                        |
| Itchins et al. 2017 [7]   | 14                     | 34.8                                   | 25.9 (12-nr)                      | NR                                 |
| Pietrasz et al. 2015 [13] | 47                     | 38.2 (29-47)†                          | nr                                | 16.5†                              |
| Kim et al. 2016 [17]      | 19                     | 41.4†                                  | 34.2†                             | 21.3†                              |

\* Studies not shown in this table did not report survival outcomes for BRPC patients specifically, or did not report survival at all. NR = Not Reported. nr = not reached. IQR = interquartile range. CI = confidence interval. OS = overall survival. PFS = progression-free survival.

† Resected patients only.



## Supplementary Figures

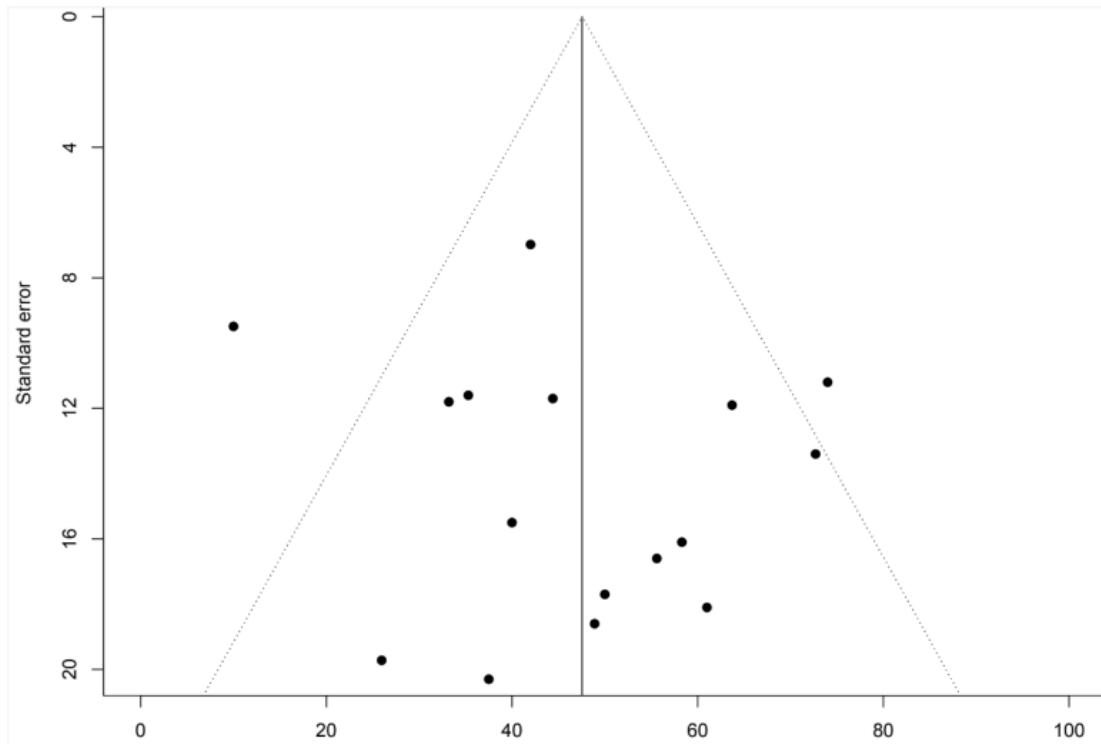

### Supplementary Figure 1: Funnel plot of the 2-year OS of studies.

Kaplan-Meier analysis of patient-level OS was used for estimation of median study OS, including only BRPC patients. Three studies are not shown in this funnel plot as Peddi et al.[21] and Mellon et al.[14] included no patients surviving at least 2 years, and Addeo et al.[11] did not have a sufficient number of events to calculate the standard error. OS = overall survival. BRPC = borderline resectable pancreatic cancer

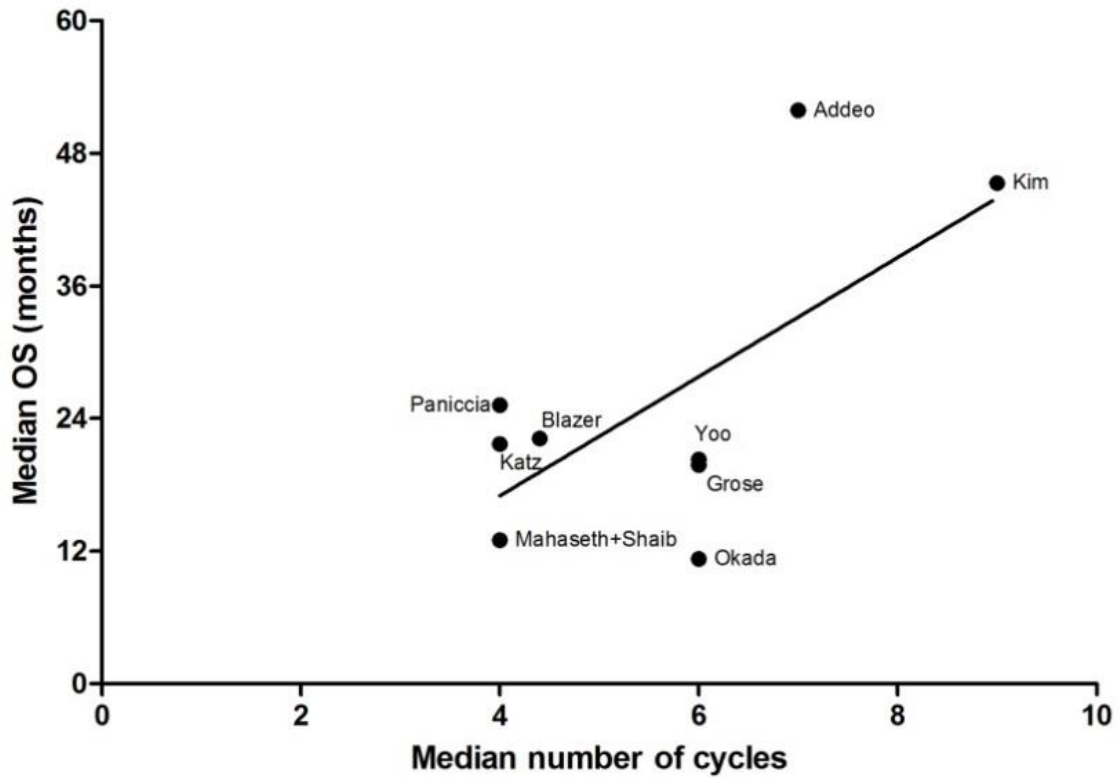

**Supplementary Figure 2: Median number of administered neoadjuvant FOLFIRINOX cycles and median OS of studies.** Kaplan-Meier analysis of patient-level OS was used for estimation of median study OS, including only BRPC patients. ( $p = 0.05$ ). Linear regression analysis was performed. P-value was calculated using a two-sided F test. OS = overall survival. BRPC = borderline resectable pancreatic cancer.

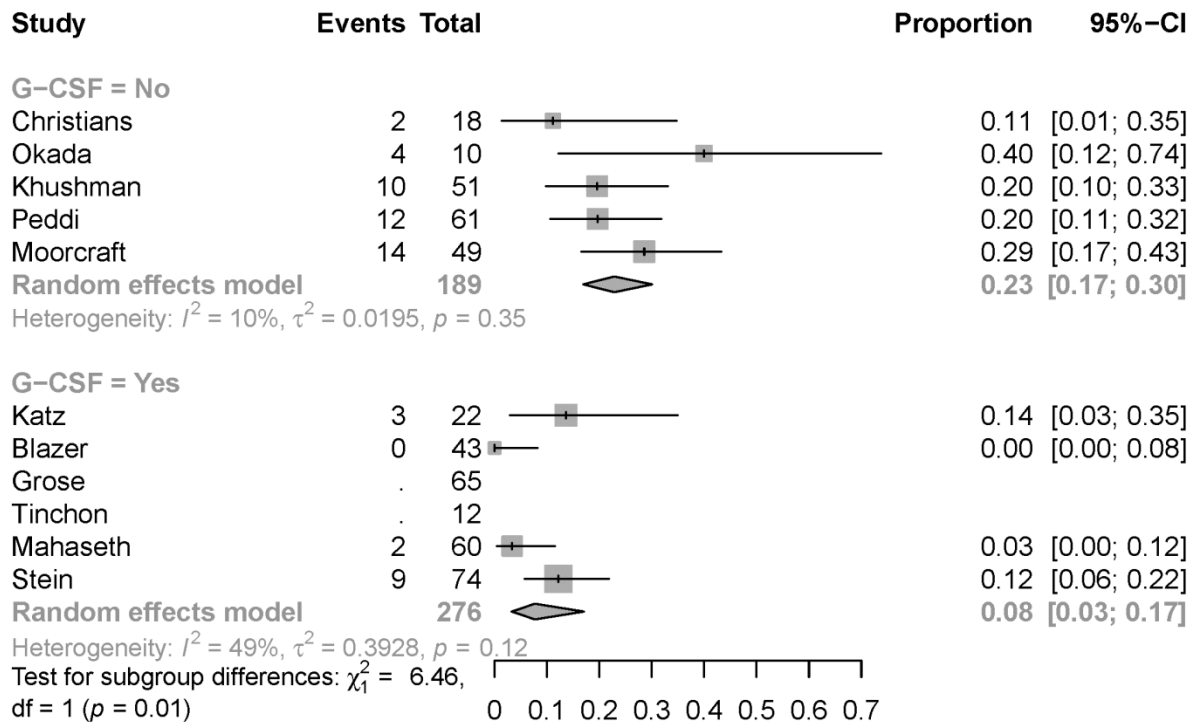

**Supplementary Figure 3: Forest plots showing reported grade 3 or 4 adverse event rates in studies with and without G-CSF prophylaxis: neutropenia ( $p = 0.01$ ).  $p$ -value was calculated using a two-sided Q-test and a random effects model. G-CSF = granulocyte-colony stimulating factor. CI = confidence interval.**

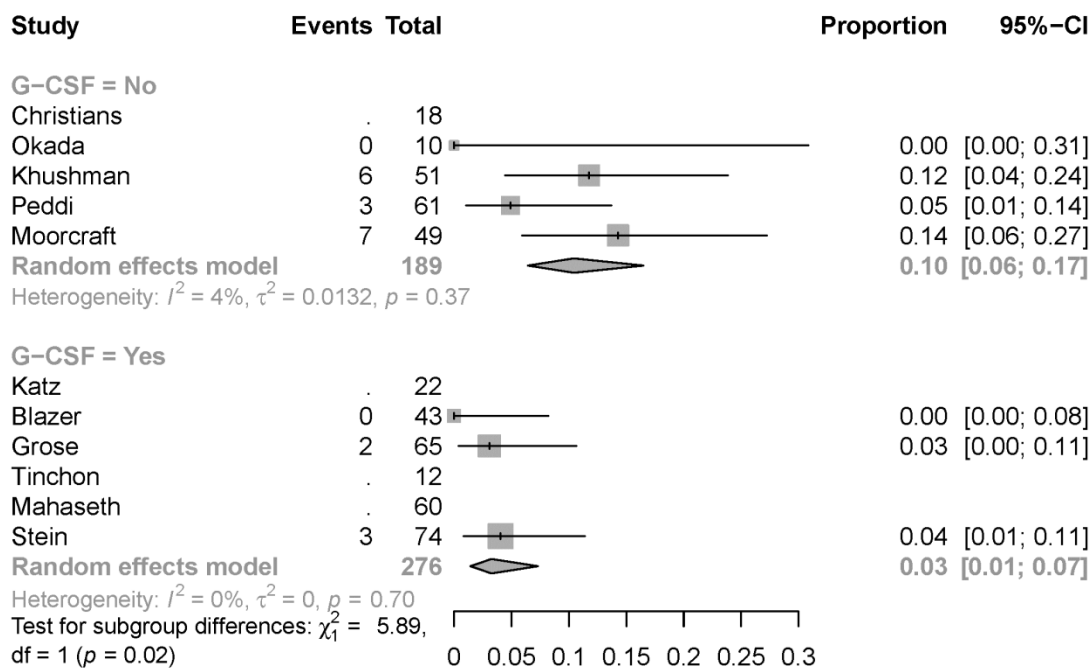

**Supplementary Figure 4: Forest plots showing reported of grade 3 or 4 adverse event rates in studies with and without G-CSF prophylaxis: febrile neutropenia. ( $p = 0.02$ )  $p$ -value was calculated using a two-sided Q-test and a random effects model. G-CSF = granulocyte-colony stimulating factor. CI = confidence interval.**

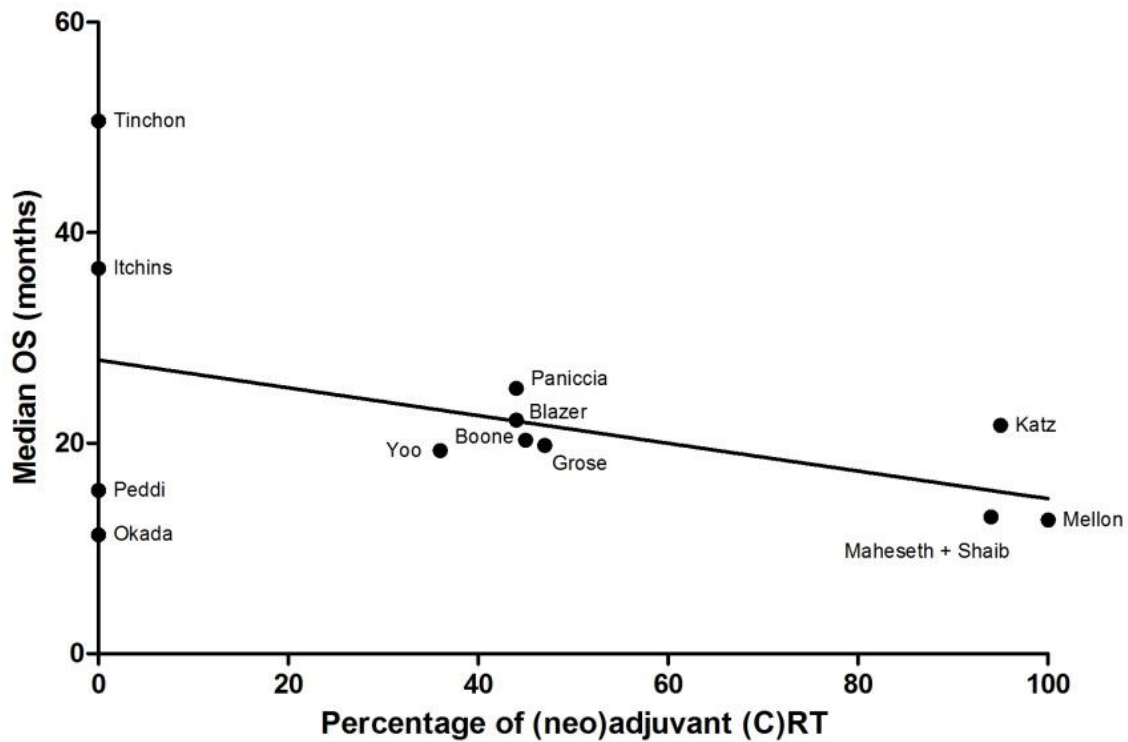

**Supplementary Figure 5: (Neo)adjuvant (C)RT after neoadjuvant FOLFIRINOX and median OS of studies.** Kaplan-Meier analysis of patient-level OS was used for estimation of median study OS, including only BRPC patients. Two studies are not shown in this figure as Addeo et al.[11] and Kim et al.[17] only included patients who underwent a resection. ( $p = 0.14$ ). Linear regression analysis was performed. P-value was calculated using a two-sided F test. OS = overall survival. BRPC = borderline resectable pancreatic cancer.

## REFERENCES

1. Panizza A, Edil BH, Schulick RD, *et al.* Neoadjuvant FOLFIRINOX application in borderline resectable pancreatic adenocarcinoma. *Medicine* 2014;93(27).
2. Christians KK, Tsai S, Mahmoud A, *et al.* Neoadjuvant FOLFIRINOX for borderline resectable pancreas cancer: A new treatment paradigm? *Oncologist* 2014;19(3):266-274.
3. Katz MH, Shi Q, Ahmad SA, *et al.* Preoperative Modified FOLFIRINOX Treatment Followed by Capecitabine-Based Chemoradiation for Borderline Resectable Pancreatic Cancer: Alliance for Clinical Trials in Oncology Trial A021101. *JAMA Surg* 2016;151(8):e161137.
4. Okada KI, Kawai M, Hirono S, *et al.* Impact of treatment duration of neoadjuvant FOLFIRINOX in patients with borderline resectable pancreatic cancer: a pilot trial. *Cancer Chemother Pharmacol* 2016:1-8.
5. Shaib WL, Hawk N, Cassidy RJ, *et al.* A Phase 1 Study of Stereotactic Body Radiation Therapy Dose Escalation for Borderline Resectable Pancreatic Cancer After Modified FOLFIRINOX (NCT01446458). 2016.
6. Yoo C, Kang J, Kim KP, *et al.* Efficacy and safety of neoadjuvant FOLFIRINOX for borderline resectable pancreatic adenocarcinoma: Improved efficacy compared with gemcitabine-based regimen. *Oncotarget* 2017;8(28):46337-46347.
7. Itchins M, Arena J, Nahm CB, *et al.* Retrospective cohort analysis of neoadjuvant treatment and survival in resectable and borderline resectable pancreatic ductal adenocarcinoma in a high volume referral centre. *Eur J Surg Oncol* 2017;43(9):1711-1717.
8. Shrestha B, Sun YF, Faisal F, *et al.* Long-term survival benefit of upfront chemotherapy in patients with newly diagnosed borderline resectable pancreatic cancer. *Cancer Med.* 2017;6(7):1552-1562.

9. Boone BA, Steve J, Krasinskas AM, *et al.* Outcomes with FOLFIRINOX for borderline resectable and locally unresectable pancreatic cancer. *J Surg Oncol* 2013;108(4):236-241.
10. Ferrone CR, Marchegiani G, Hong TS, *et al.* Radiological and Surgical Implications of Neoadjuvant Treatment With FOLFIRINOX for Locally Advanced and Borderline Resectable Pancreatic Cancer. *Ann. Surg.* 2015;261(1):12-17.
11. Addeo P, Rosso E, Fuchshuber P, *et al.* Resection of Borderline Resectable and Locally Advanced Pancreatic Adenocarcinomas after Neoadjuvant Chemotherapy. *Oncology* 2015;89(1):37-46.
12. Khushman M, Dempsey N, Cudris Maldonado J, *et al.* Full dose neoadjuvant FOLFIRINOX is associated with prolonged survival in patients with locally advanced pancreatic adenocarcinoma. *Pancreatology* 2015;15(6):667-673.
13. Pietrasz D, Marthey L, Wagner M, *et al.* Pathologic Major Response After FOLFIRINOX is Prognostic for Patients Secondary Resected for Borderline or Locally Advanced Pancreatic Adenocarcinoma: An AGEO-FRENCH, Prospective, Multicentric Cohort. *Ann Surg Oncol* 2015;22:1196-1205.
14. Mellon EA, Hoffe SE, Springett GM, *et al.* Long-term outcomes of induction chemotherapy and neoadjuvant stereotactic body radiotherapy for borderline resectable and locally advanced pancreatic adenocarcinoma. *Acta Oncol* 2015;54(7):979-985.
15. Blazer M, Wu C, Goldberg RM, *et al.* Neoadjuvant Modified (m) FOLFIRINOX for Locally Advanced Unresectable (LAPC) and Borderline Resectable (BRPC) Adenocarcinoma of the Pancreas. *Ann Surg Oncol* 2014.
16. Badiyan SN, Olsen JR, Lee AY, *et al.* Induction chemotherapy followed by concurrent full-dose gemcitabine and intensity-modulated radiation therapy for borderline resectable

and locally advanced pancreatic adenocarcinoma. *Am J Clin Oncol Cancer Clin Trials* 2016;39(1):1-7.

17. Kim SS, Nakakura EK, Wang ZJ, *et al.* Preoperative FOLFIRINOX for borderline resectable pancreatic cancer: Is radiation necessary in the modern era of chemotherapy? *J Surg Oncol* 2016.

18. Vogel JA, Rombouts SJ, de Rooij T, *et al.* Induction Chemotherapy Followed by Resection or Irreversible Electroporation in Locally Advanced Pancreatic Cancer (IMPALA): A Prospective Cohort Study. *Ann Surg Oncol* 2017;24(9):2734-2743.

19. Grose D, McIntosh D, Jamieson N, *et al.* The role of induction chemotherapy + chemoradiotherapy in localised pancreatic cancer: Initial experience in Scotland. *J Gastrointest Oncol* 2017;8(4):683-695.

20. Tinchon C, Hubmann E, Pichler A, *et al.* Safety and efficacy of neoadjuvant FOLFIRINOX treatment in a series of patients with borderline resectable pancreatic ductal adenocarcinoma. *Acta Oncol* 2013;52(6):1231-1234.

21. Peddi PF, Lubner S, McWilliams R, *et al.* Multi-institutional experience with FOLFIRINOX in pancreatic adenocarcinoma. *J Pancreas* 2012;13(5):497-501.

22. Mahaseth H, Brutcher E, Kauh J, *et al.* Modified FOLFIRINOX regimen with improved safety and maintained efficacy in pancreatic adenocarcinoma. *Pancreas* 2013;42(8):1311-1315.

23. Moorcraft SY. FOLFIRINOX for Locally Advanced or Metastatic Pancreatic Ductal Adenocarcinoma: The Royal Marsden Experience. *Clin Colorectal Cancer* 2014;13(4):232-238.



24. Stein SM, James ES, Deng Y, *et al.* Final analysis of a phase II study of modified FOLFIRINOX in locally advanced and metastatic pancreatic cancer. *Br J Cancer* 2016;114(7):737-743.
